# Supplementary material for: Evolution of the Physical and Social Spaces of ‘Village Resettlement Communities’ from the Production of Space Perspective: A Case Study of Qunyi Community in Kunshan
Source: MDPI journal article supplement (doi:10.3390/ijerph16162980), 2019-08-19
Supplement: s1 [file s1]

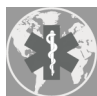

## Supplementary File S1

### Questionnaire for the migrant workers in Qunyi Community

Note: your answers to this questionnaire will be kept confidential.

#### Section 1 The basic information

1. Your age: \_\_\_\_\_; Gender: ①male ②female; Marriage: ①unmarried ② married
- 2-1. Your registration status:  
①agricultural registered permanent residence ②non-agricultural registered permanent residence.
- 2-2. Where is your registered residence's address?  
①Jiangsu Province ②Other Provinces (Please specify: \_\_\_\_\_)
- County (City) Name (Please specify): \_\_\_\_\_
3. Your education level:  
①primary school and below ②junior high school ③senior high school /vocational high school ④junior college/ undergraduate and above
- 4-1. Your occupation:  
①government employee / public servant ②enterprise worker ③manager / technical staff ④businessman
- 4-2. Your workplace \_\_\_\_\_; your income per year \_\_\_\_\_
- 5-1. Do you have children?  
① Yes (the number of children \_\_\_\_\_; Age: \_\_\_\_\_) ② No
- 5-2. If the answer of Questions 5-1 is ①, where do your children live?  
① Hometown ② Kunshan ③ elsewhere (Please specify: \_\_\_\_\_)

#### Section 2 The conditions of the rented apartment

- 6-1. The time you came to Kunshan \_\_\_\_\_; the time you moved to this community \_\_\_\_\_
- 6-2. The length of residency in this community \_\_\_\_\_
- 6-3. Where did you live before you moved to your present house?  
① factory dormitories ②other communities (rent \_\_\_\_\_ yuan per month) ③other (Please specify: \_\_\_\_\_)
7. Your current renting conditions: renting area \_\_\_\_\_m<sup>2</sup>; the number of rooms \_\_\_\_\_; the rents \_\_\_\_\_Yuan per month; the ratio of rent to monthly income \_\_\_\_\_%; do you feel the rent is expensive or not? \_\_\_\_\_
- 8-1. Do you share the apartment with others? Yes \_\_\_\_\_No \_\_\_\_\_
- 8-2. The total number of people live in your apartment \_\_\_\_\_
- 8-3. Who is your roommate?  
① Family (spouse) ② Family (including parents and children) ③ Friends ④ oneself ⑤ Others (Please specify: \_\_\_\_\_)
9. Your commuting distance \_\_\_\_\_km<sup>2</sup>; Commuting time \_\_\_\_\_minutes; Commuting vehicles: \_\_\_\_\_
- 10-1. How did you get the information of the apartment?  
① advertisement (including posters) ② work unit ③ friends ④Other (Please specify: \_\_\_\_\_)
- 10-2. The major determinants of renting the apartment in this community  
① low rent ② short commuting distance ③ close to friends and fellow villagers ④ Other (Please specify: \_\_\_\_\_)
- 11-1. How do you feel about the environment, security, hygiene, management, etc. of the community?  
①satisfied ② dissatisfied ③ Other (Please specify: \_\_\_\_\_)
- 11-2. Please specify the main problems of the community: \_\_\_\_\_

#### Section 3 The social interaction and daily activities

12. Your relationship with your landlord:  
①General (only pay the rent monthly) ②Good (including frequent contacts and mutual assistance) ③Other (Please specify: \_\_\_\_\_)
13. How did you get the information of your present job?  
①by yourself ②fellow villagers ③the landlord ④locals (including neighbors, landlords, etc.) ⑤friends made after came to Kunshan ⑥employment agency ⑦Other (Please specify: \_\_\_\_\_)
14. Who do you usually associate with?  
①relatives ②fellow villagers ③co-workers ④locals (including neighbors, landlords, etc.) ⑤friends made after came to Kunshan ⑥Other (Please specify: \_\_\_\_\_)

15. Your views on the other three types of residents (landless farmers, local New Kunshan citizens, and alien New Kunshan citizens) (Please specify): \_\_\_\_\_

16. If you encounter problems in housing, employment, family affair, economic issues, children's education, etc., who do you usually consult with?

- ①family ②relatives ③fellow villagers ④co-workers ⑤locals (including neighbors, landlords, etc.) ⑥ friends made after came to Kunshan ⑦Other (Please specify: \_\_\_\_\_)

17. Your daily activities after work and the location: (Please specify): \_\_\_\_\_

#### Section 4 The envision of work and life

18. If you have a chance, would you like to move to a better community?

- ① really hope ②hope ③not interested ④ have no idea

19. How many years do you plan to move to a better community?

- ①Within 1 year ②1-2 years ③2-3 years ④3-5 years ⑤Live here for a long time ⑥No idea

20-1. If you can move to a better community, where would you like to choose?

- ①hometown ②the Kunshan City ③near your work ④the nearby Cities

20-2. Please write down the reasons for your choice: \_\_\_\_\_

21. Please introduce your work envisions:

- ①do farming in hometown ②do non-agricultural work in hometown (Please specify: \_\_\_\_\_) ③continue to work in factories in Kunshan or elsewhere ④find another job in Kunshan or elsewhere (Please specify: \_\_\_\_\_) ⑤Other (Please specify: \_\_\_\_\_)

22. Do you want to get a local non-agricultural residence registration in Kunshan and become a new Kunshan citizen:

- ①really hope ②hope ③not interested ④ have no idea

**Thank you for your cooperation!**

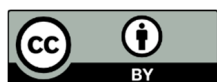

© 2019 by the authors. Submitted for possible open access publication under the terms and conditions of the Creative Commons Attribution (CC BY) license (<http://creativecommons.org/licenses/by/4.0/>).
